# Supplementary material
Source: PubMed Central journal article supplement (PMC546154)
Supplement: nar_33_1_272__1.pdf [file nar_33_1_272__1.pdf]

Nils Blüthgen, Szymon M. Kielbasa, and Hanspeter Herzel

Inferring Combinatorial Regulation  
of Transcription *in silico*.

**Supplement**

Table S1: Significantly associated biological processes (FDR<0.05) for the 14 sub-sets of the muscle related transcription factors that have at least one significantly associated process. (#genes: number of genes that have both a cluster of binding sites and are annotated with the GO-term; p-value: single test p-value obtained by the one sided Fisher’s exact test; FDR: false discovery rate)

| GO id               | GO-term                             | # genes | p-value              | FDR    |
|---------------------|-------------------------------------|---------|----------------------|--------|
| Set: SRF, TEF       |                                     |         |                      |        |
| 7517                | muscle development                  | 9       | $3.26 \cdot 10^{-6}$ | 0.0010 |
| Set: Sp-1, SRF, TEF |                                     |         |                      |        |
| 7517                | muscle development                  | 16      | $8.2 \cdot 10^{-5}$  | 0.012  |
| 45449               | regulation of transcription         | 129     | $8.8 \cdot 10^{-5}$  | 0.012  |
| 6351                | transcription, DNA-dependent        | 131     | $9.0 \cdot 10^{-5}$  | 0.012  |
| 6355                | regulation of transcription, DNA-d. | 128     | 0.00011              | 0.012  |
| 6350                | transcription                       | 132     | 0.00015              | 0.012  |
| 7275                | development                         | 93      | 0.00015              | 0.012  |
| 9653                | morphogenesis                       | 60      | 0.00078              | 0.050  |
| Set: Myf, SRF       |                                     |         |                      |        |
| 6631                | fatty acid metabolism               | 13      | $7.52 \cdot 10^{-5}$ | 0.034  |
| Set: Myf, SRF, TEF  |                                     |         |                      |        |
| 7517                | muscle development                  | 14      | $5.5 \cdot 10^{-6}$  | 0.0019 |
| Set: Myf,Sp-1, SRF  |                                     |         |                      |        |
| 6351                | transcription, DNA-dependent        | 161     | $3.7 \cdot 10^{-5}$  | 0.011  |
| 45449               | regulation of transcription         | 157     | $6.7 \cdot 10^{-5}$  | 0.011  |
| 6355                | regulation of transcription, DNA-d. | 156     | $7.6 \cdot 10^{-5}$  | 0.011  |
| 6350                | transcription                       | 161     | 0.00011              | 0.011  |
| Set: Mef-2, TEF     |                                     |         |                      |        |
| 30183               | B-cell differentiation              | 5       | $2.7 \cdot 10^{-5}$  | 0.0096 |
| 30098               | lymphocyte differentiation          | 6       | $6.64 \cdot 10^{-5}$ | 0.014  |
| 42113               | B-cell activation                   | 5       | 0.00035              | 0.047  |
| 30097               | hemopoiesis                         | 7       | 0.00045              | 0.047  |

Table S1 continued

| GO id               | GO-term                         | # genes | p-value             | FDR                 |
|---------------------|---------------------------------|---------|---------------------|---------------------|
| Set: Mef-2,SRF      |                                 |         |                     |                     |
| 7517                | muscle development              | 16      | $3.9 \cdot 10^{-8}$ | $1.1 \cdot 10^{-5}$ |
| 30183               | B-cell differentiation          | 5       | $1.3 \cdot 10^{-5}$ | 0.0023              |
| 30098               | lymphocyte differentiation      | 6       | $2.7 \cdot 10^{-5}$ | 0.0038              |
| 42113               | B-cell activation               | 5       | 0.00017             | 0.016               |
| 30097               | hemopoiesis                     | 7       | 0.00017             | 0.016               |
| 9887                | organogenesis                   | 36      | 0.00023             | 0.016               |
| 6936                | muscle contraction              | 11      | 0.00048             | 0.026               |
| 9653                | morphogenesis                   | 38      | 0.00063             | 0.032               |
| Set: Mef-2,SRF,TEF  |                                 |         |                     |                     |
| 7517                | muscle development              | 15      | $8.2 \cdot 10^{-8}$ | $2.5 \cdot 10^{-5}$ |
| 30183               | B-cell differentiation          | 5       | $8.4 \cdot 10^{-6}$ | 0.0015              |
| 30098               | lymphocyte differentiation      | 6       | $1.7 \cdot 10^{-5}$ | 0.0026              |
| 9887                | organogenesis                   | 35      | $9.1 \cdot 10^{-5}$ | 0.0073              |
| 30097               | hemopoiesis                     | 7       | 0.00010             | 0.0073              |
| 42113               | B-cell activation               | 5       | 0.00011             | 0.0073              |
| 9653                | morphogenesis                   | 37      | 0.00024             | 0.013               |
| 45191               | regulation of isotype switching | 2       | 0.00057             | 0.048               |
| Set: Mef-2,Sp-1,SRF |                                 |         |                     |                     |
| 30183               | B-cell differentiation          | 6       | $4.3 \cdot 10^{-5}$ | 0.015               |
| 7517                | muscle development              | 18      | $8.5 \cdot 10^{-5}$ | 0.015               |
| 42113               | B-cell activation               | 7       | 0.00012             | 0.015               |
| 30098               | lymphocyte differentiation      | 7       | 0.00030             | 0.038               |
| Set: Mef-2,Myf      |                                 |         |                     |                     |
| 6941                | striated muscle contraction     | 9       | $3.1 \cdot 10^{-5}$ | 0.013               |
| 6936                | muscle contraction              | 19      | 0.00018             | 0.036               |
| 45190               | isotype switching               | 3       | 0.00021             | 0.036               |
| 30097               | hemopoiesis                     | 10      | 0.00031             | 0.036               |
| 30098               | lymphocyte differentiation      | 7       | 0.00037             | 0.036               |

Table S1 continued

| GO id                       | GO-term                     | # genes | p-value             | FDR     |
|-----------------------------|-----------------------------|---------|---------------------|---------|
| Set: Mef-2,Myf,TEF          |                             |         |                     |         |
| 6941                        | striated muscle contraction | 9       | $7.6 \cdot 10^{-6}$ | 0.0025  |
| 7517                        | muscle development          | 18      | $1.3 \cdot 10^{-5}$ | 0.0025  |
| 6936                        | muscle contraction          | 18      | $5.9 \cdot 10^{-5}$ | 0.0074  |
| 45190                       | isotype switching           | 3       | 0.00013             | 0.018   |
| 30183                       | B-cell differentiation      | 5       | 0.00029             | 0.028   |
| 30097                       | hemopoiesis                 | 9       | 0.00039             | 0.028   |
| 42113                       | B-cell activation           | 6       | 0.00044             | 0.028   |
| Set: Mef-2,Myf,SRF          |                             |         |                     |         |
| 7517                        | muscle development          | 18      | $2.7 \cdot 10^{-6}$ | 0.00079 |
| 45190                       | isotype switching           | 3       | $8.9 \cdot 10^{-5}$ | 0.015   |
| 6936                        | muscle contraction          | 16      | 0.00016             | 0.015   |
| 30097                       | hemopoiesis                 | 9       | 0.00017             | 0.015   |
| 30183                       | B-cell differentiation      | 5       | 0.00017             | 0.015   |
| 6941                        | striated muscle contraction | 7       | 0.00023             | 0.015   |
| 42113                       | B-cell activation           | 6       | 0.00024             | 0.015   |
| 30098                       | lymphocyte differentiation  | 6       | 0.00052             | 0.032   |
| Set: Mef-2,Myf,SRF,TEF      |                             |         |                     |         |
| 7517                        | muscle development          | 15      | $2.5 \cdot 10^{-5}$ | 0.0089  |
| Set: Mef-2,Myf,Sp-1,SRF,TEF |                             |         |                     |         |
| 7517                        | muscle development          | 20      | $8.0 \cdot 10^{-6}$ | 0.0027  |
| 6936                        | muscle contraction          | 20      | $4.2 \cdot 10^{-5}$ | 0.0080  |
| 42113                       | B-cell activation           | 7       | 0.00012             | 0.017   |

Table S2: Significantly associated biological processes (FDR<0.05) for the transcription factors CREB, CEBP, p50/p65, Sp-1, ETS and AP1. (#genes: number of genes that have both a cluster of binding sites and are annotated with the GO-term; p-value: single test p-value obtained by the one sided Fisher's exact test; FDR: false discovery rate)

| GO id | GO-term                     | # genes | p-value             | FDR    |
|-------|-----------------------------|---------|---------------------|--------|
| 6935  | chemotaxis                  | 30      | $2.9 \cdot 10^{-5}$ | 0.0059 |
| 42330 | taxis                       | 30      | $2.9 \cdot 10^{-5}$ | 0.0059 |
| 7154  | cell communication          | 406     | 0.00012             | 0.016  |
| 6950  | response to stress          | 120     | 0.00028             | 0.028  |
| 9607  | response to biotic stimulus | 131     | 0.00030             | 0.036  |
| 7155  | cell adhesion               | 90      | 0.00050             | 0.042  |

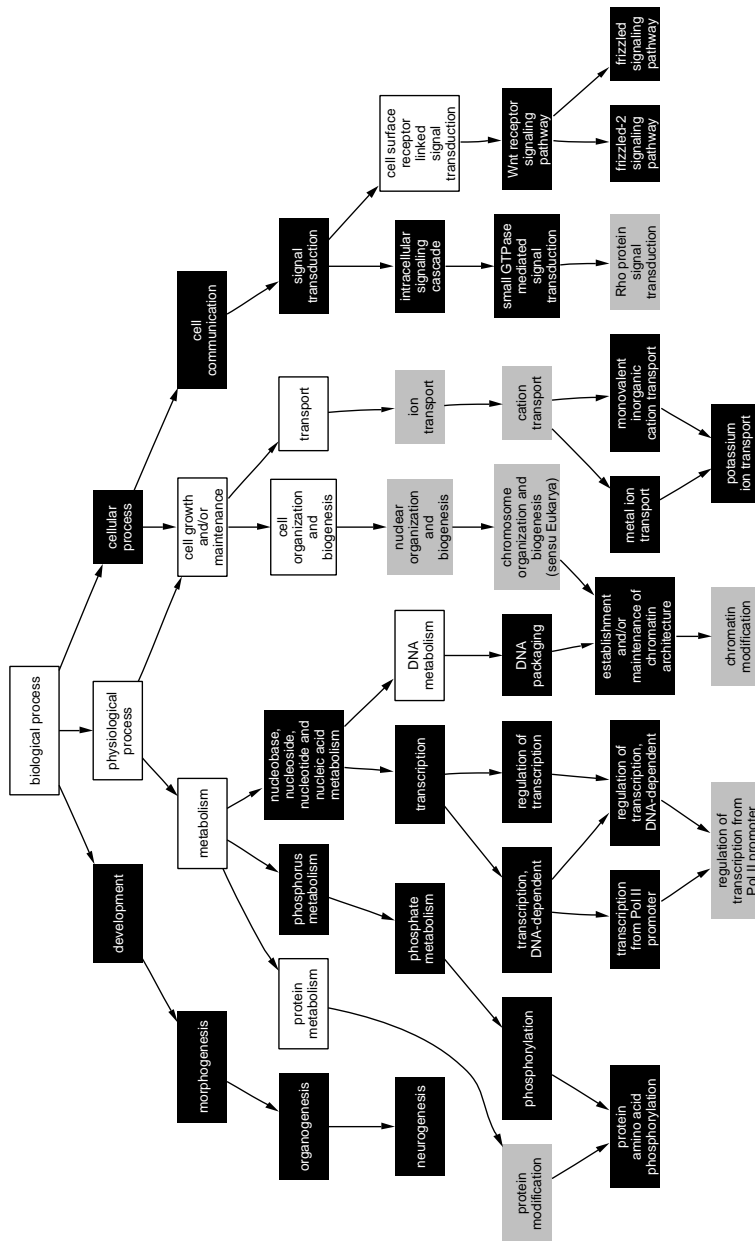

Fig. S1. Black and grey boxes indicate the significantly associated biological processes (FDR<0.01 and 0.05, respectively) with the 10% of genes having the highest GC-content in their upstream regions.

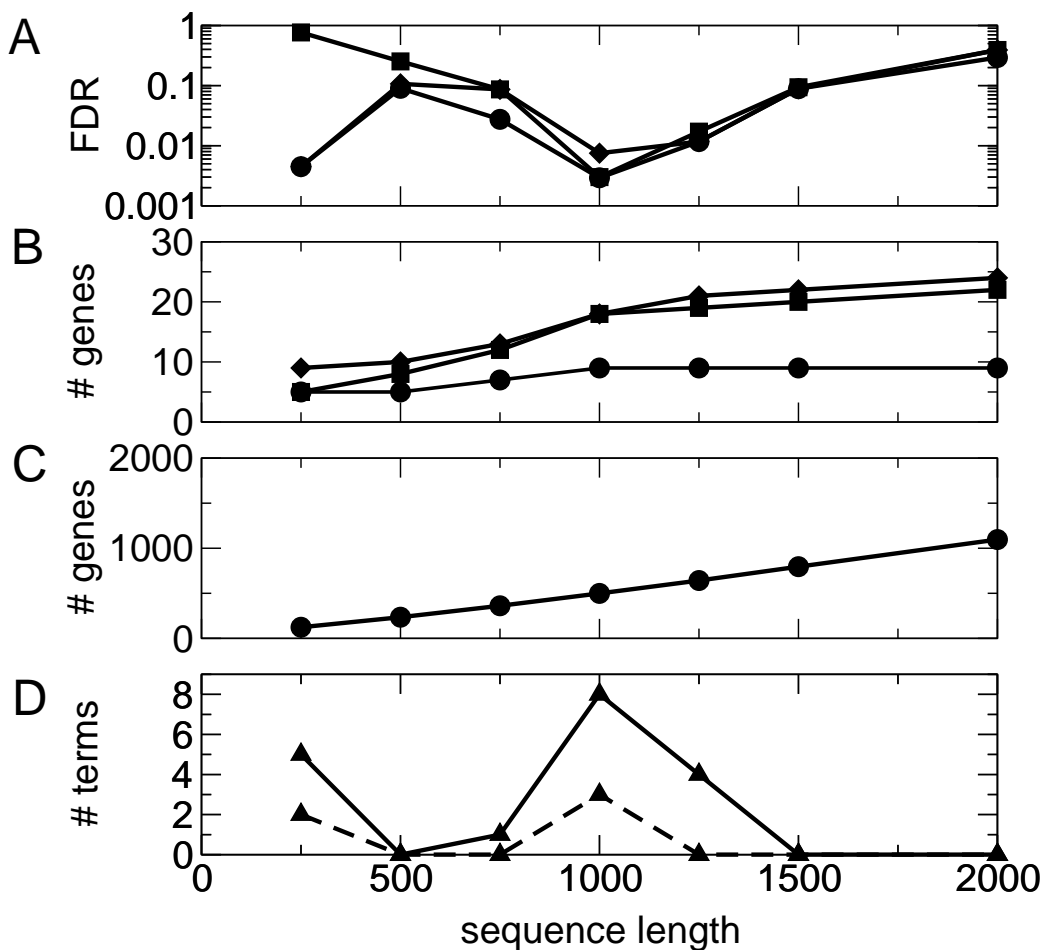

Fig. S2. The effect of varying the length of the upstream regions on the predictions for the set of Mef-2, Myf and TEF transcription factors. A: False Discovery Rate (FDR) of the terms *striated muscle contraction* (circles), *muscle contraction* (squares) and *muscle development* (diamonds). B: Number of genes where a cluster of binding sites has been found by cluster-buster annotated with the terms *striated muscle contraction* (circles), *muscle contraction* (squares) and *muscle development* (diamonds). C: Total number of genes with a cluster of binding sites predicted by cluster-buster. D: Number of significant terms with  $FDR < 0.05$  (solid line) and  $FDR < 0.01$  (dashed line).

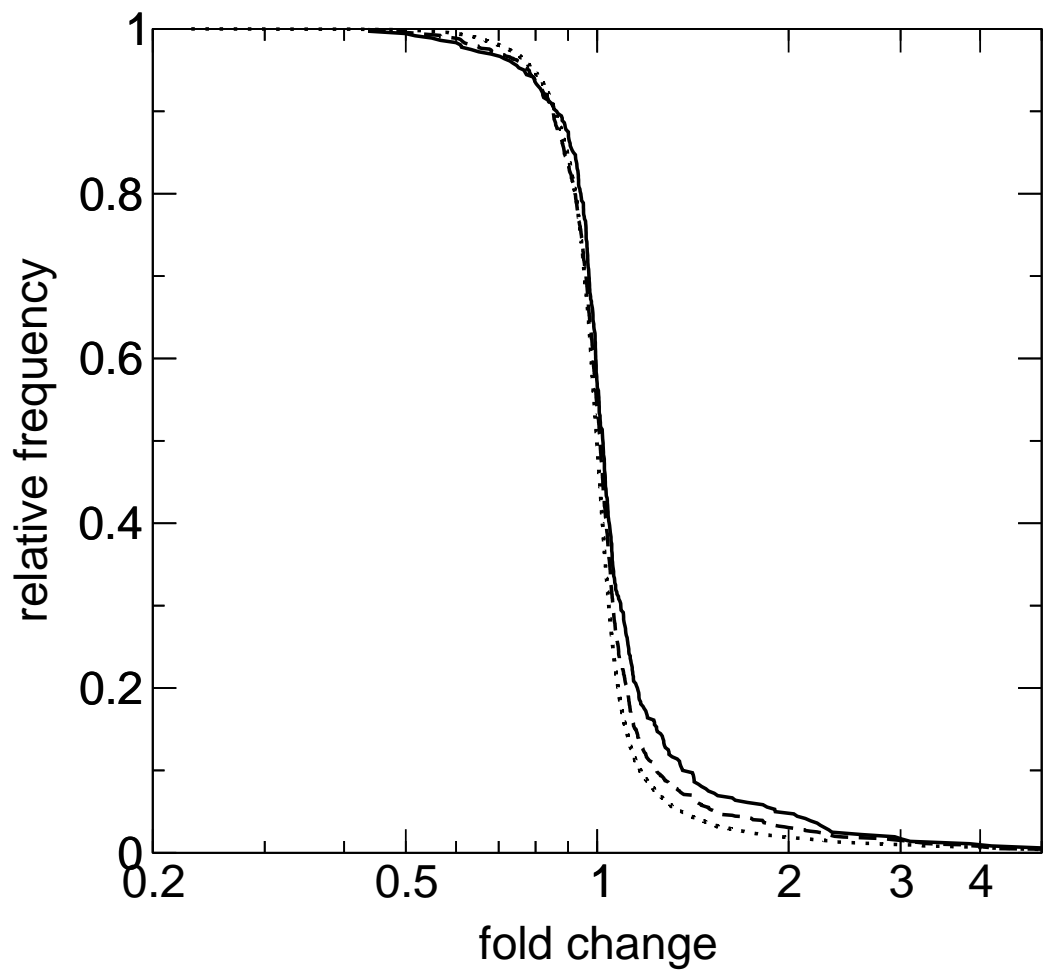

Fig. S3. Normalized cumulative histograms of mean fold changes in the microarray data set for all genes (dotted line), genes where Cluster-Buster detected a cluster of binding sites (dashed line), and after additional filtering with GO (solid line).
